# Supplementary material for: Machine Learning for Halide Perovskite Materials ABX3 (B = Pb, X = I, Br, Cl) Assessment of Structural Properties and Band Gap Engineering for Solar Energy
Source: MDPI journal article supplement (doi:10.3390/ma16072657), 2023-03-27
Supplement: s1 [file s1]

## Supplementary data

Afnan Alhashmi <sup>1</sup>, Mohammed Benali Kanoun <sup>2</sup> and Souraya Goumri-Said <sup>3,\*</sup>

<sup>1</sup> Department of Physics, College of Science, King Faisal University,  
P.O. Box 400, Al-Ahsa 31982, Saudi Arabia

<sup>2</sup> Department of Mathematics and Sciences, College of Humanities and Sciences, Prince Sultan  
University, P.O. Box 66833, Riyadh 11586, Saudi Arabia; mkanoun@psu.edu.sa

<sup>3</sup> Physics Department, Colleges of Science and General Studies, Alfaisal University,  
P.O. Box 50927, Riyadh 11533, Saudi Arabia

\* Correspondence: sosaid@alfaisal.edu; Tel.: +966-112-158-984

**S1. Table S1. Formation Data for 81 ABX<sub>3</sub> perovskites.**

|    | <i>Formula</i>      | <i>delta H (ev)</i> | <i>V</i>   | <i>Eg (ev)</i> | <i>eps0</i> | <i>structure</i> |
|----|---------------------|---------------------|------------|----------------|-------------|------------------|
| 1  | MAPbI <sub>3</sub>  | -0.908721326        | 245.03719  | 2.03           | 5.4         | cubic            |
| 2  | MAPbBr <sub>3</sub> | -1.439176426        | 205.663607 | 2.49           | 4.4         | cubic            |
| 3  | MAPbCl <sub>3</sub> | -1.28355653         | 181.9883   | 2.856          | 3.9         | cubic            |
| 4  | MASnI <sub>3</sub>  | -1.37631947         | 231.212919 | 1.563          | 5.9         | cubic            |
| 5  | MASnBr <sub>3</sub> | -1.464300559        | 192.322513 | 1.68           | 5.1         | cubic            |
| 6  | MASnCl <sub>3</sub> | -1.203087249        | 169.336753 | 1.675          | 4.5         | cubic            |
| 7  | MAGeI <sub>3</sub>  | -1.640658436        | 210.434461 | 1.76           | 6.3         | cubic            |
| 8  | MAGeBr <sub>3</sub> | -1.726001626        | 179.909605 | 2.05           | 5.1         | cubic            |
| 9  | MAGeCl <sub>3</sub> | -1.464040205        | 159.820718 | 2.55           | 4.2         | cubic            |
| 10 | MAPbI <sub>3</sub>  | -0.99001602         | 956.510671 | 1.5            | 6.6         | tetragonal       |
| 11 | MAPbBr <sub>3</sub> | -1.288475969        | 805.564731 | 1.95           | 4.71        | tetragonal       |
| 12 | MAPbCl <sub>3</sub> | -1.139852308        | 716.420495 | 2.45           | 3.96        | tetragonal       |
| 13 | MASnI <sub>3</sub>  | -1.187807792        | 934.204581 | 0.6            | 10.35       | tetragonal       |
| 14 | MASnBr <sub>3</sub> | -1.4349335          | 801.567061 | 1              | 5.78        | tetragonal       |
| 15 | MASnCl <sub>3</sub> | -0.276591335        | 738.415858 | 1.4            | 4.55        | tetragonal       |
| 16 | MAGeI <sub>3</sub>  | -1.35795805         | 786.594233 | 1.12           | 6.85        | tetragonal       |
| 17 | MAGeBr <sub>3</sub> | -1.536461912        | 753.488654 | 1.48           | 4.9         | tetragonal       |

|    |                      |              |            |       |      |              |
|----|----------------------|--------------|------------|-------|------|--------------|
| 18 | MAGeCl <sub>3</sub>  | -1.382272633 | 659.666015 | 2.01  | 4.1  | tetragonal   |
| 19 | MAPbI <sub>3</sub>   | -0.81006116  | 919.058209 | 1.52  | 5.8  | orthorhombic |
| 20 | MAPbBr <sub>3</sub>  | -1.335260294 | 797.538219 | 2     | 4.7  | orthorhombic |
| 21 | MAPbCl <sub>3</sub>  | -1.249112467 | 715.195393 | 2.5   | 4.1  | orthorhombic |
| 22 | MASnI <sub>3</sub>   | -1.22899541  | 915.973874 | 0.77  | 7.6  | orthorhombic |
| 23 | MASnBr <sub>3</sub>  | -1.4513816   | 779.524593 | 1.11  | 5.7  | orthorhombic |
| 24 | MASnCl <sub>3</sub>  | -1.149066142 | 681.025304 | 1.33  | 4.9  | orthorhombic |
| 25 | MAGeI <sub>3</sub>   | -1.257113681 | 823.4845   | 0.855 | 8.7  | orthorhombic |
| 26 | MAGeBr <sub>3</sub>  | -1.329922693 | 688.628935 | 0.83  | 7.5  | orthorhombic |
| 27 | MAGeCl <sub>3</sub>  | -1.129166739 | 603.725147 | 1.09  | 5.9  | orthorhombic |
| 28 | FAPbI <sub>3</sub>   | -0.477824046 | 250.77397  | 1.5   | 7.2  | cubic        |
| 29 | FAPbBr <sub>3</sub>  | -0.549036961 | 216.546682 | 2.6   | 4.4  | cubic        |
| 30 | FAPbCl <sub>3</sub>  | -1.272007144 | 193.517739 | 2.9   | 3.9  | cubic        |
| 31 | FASnI <sub>3</sub>   | -0.749274702 | 241.317051 | 1.05  | 5.9  | cubic        |
| 32 | FASnBr <sub>3</sub>  | -0.636200491 | 208.473339 | 1.81  | 4.9  | cubic        |
| 33 | FASnCl <sub>3</sub>  | -1.30070581  | 188.695049 | 2.2   | 4.3  | cubic        |
| 34 | FAGeI <sub>3</sub>   | -0.875304253 | 224.060664 | 1.88  | 6.4  | cubic        |
| 35 | FAGeBr <sub>3</sub>  | -0.477150368 | 191.102942 | 2.1   | 5.2  | cubic        |
| 36 | FAGeCl <sub>3</sub>  | -1.186501893 | 172.017238 | 2.42  | 4.4  | cubic        |
| 37 | DMAPbI <sub>3</sub>  | -0.492518057 | 259.468341 | 1.41  | 7    | cubic        |
| 38 | DMAPbBr <sub>3</sub> | -0.60536612  | 214.633747 | 2.45  | 4.5  | cubic        |
| 39 | DMAPbCl <sub>3</sub> | -0.54088092  | 193.871035 | 2.9   | 3.9  | cubic        |
| 40 | DMASnI <sub>3</sub>  | -0.712147201 | 251.171209 | 1.1   | 7.5  | cubic        |
| 41 | DMASnBr <sub>3</sub> | -0.686408253 | 214.266082 | 2     | 4.7  | cubic        |
| 42 | DMASnCl <sub>3</sub> | -0.672413639 | 200.942108 | 2.7   | 3.7  | cubic        |
| 43 | DMAGeI <sub>3</sub>  | -0.698507977 | 241.28263  | 1.98  | 5.25 | cubic        |
| 44 | DMAGeBr <sub>3</sub> | -0.77150832  | 206.514052 | 2.55  | 4.2  | cubic        |
| 45 | DMAGeCl <sub>3</sub> | -0.802250595 | 187.801791 | 3.2   | 3.5  | cubic        |
| 46 | TMAPbI <sub>3</sub>  | -0.522804956 | 285.0537   | 1.7   | 6.15 | cubic        |
| 47 | TMAPbBr <sub>3</sub> | -0.73457816  | 263.814655 | 2.62  | 4.1  | cubic        |
| 48 | TMAPbCl <sub>3</sub> | -0.478176436 | 236.63358  | 3.4   | 3.6  | cubic        |

|    |                      |              |            |      |      |       |
|----|----------------------|--------------|------------|------|------|-------|
| 49 | TMASnI <sub>3</sub>  | -0.633599056 | 286.31714  | 1.25 | 6.1  | cubic |
| 50 | TMASnBr <sub>3</sub> | -0.740205963 | 258.291765 | 2.3  | 4.1  | cubic |
| 51 | TMASnCl <sub>3</sub> | -0.681181433 | 238.382968 | 3.2  | 3.44 | cubic |
| 52 | TMAGeI <sub>3</sub>  | -0.713486867 | 289.454946 | 2.2  | 4.4  | cubic |
| 53 | TMAGeBr <sub>3</sub> | -0.792016961 | 259.886552 | 2.72 | 3.7  | cubic |
| 54 | TMAGeCl <sub>3</sub> | -0.892964973 | 232.748077 | 3.8  | 3.3  | cubic |
| 55 | EAPbI <sub>3</sub>   | -0.950075649 | 256.666118 | 1.61 | 7    | cubic |
| 56 | EAPbBr <sub>3</sub>  | -0.897816927 | 216.197943 | 2.51 | 4.43 | cubic |
| 57 | EAPbCl <sub>3</sub>  | -0.871243281 | 192.621649 | 2.97 | 3.95 | cubic |
| 58 | EASnI <sub>3</sub>   | -1.168934793 | 249.863822 | 1.34 | 7    | cubic |
| 59 | EASnBr <sub>3</sub>  | -0.97688106  | 212.827676 | 1.9  | 4.2  | cubic |
| 60 | EASnCl <sub>3</sub>  | -0.960882001 | 193.904703 | 2.59 | 3.91 | cubic |
| 61 | EAGeI <sub>3</sub>   | -0.930092569 | 230.124166 | 1.7  | 5.8  | cubic |
| 62 | EAGeBr <sub>3</sub>  | -1.039604127 | 206.918648 | 2.41 | 4.4  | cubic |
| 63 | EAGeCl <sub>3</sub>  | -1.143701956 | 185.060178 | 3.15 | 3.68 | cubic |
| 64 | GUAPbI <sub>3</sub>  | -0.929288266 | 255.456063 | 1.47 | 7.4  | cubic |
| 65 | GUAPbBr <sub>3</sub> | -0.829315137 | 214.041833 | 2.6  | 4.5  | cubic |
| 66 | GUAPbCl <sub>3</sub> | -0.500839188 | 189.142413 | 3.07 | 4    | cubic |
| 67 | GUASnI <sub>3</sub>  | -1.14038741  | 247.785908 | 1.7  | 5.9  | cubic |
| 68 | GUASnBr <sub>3</sub> | -0.88238027  | 209.851405 | 2.05 | 5    | cubic |
| 69 | GUASnCl <sub>3</sub> | -0.575766419 | 188.423884 | 2.7  | 4.1  | cubic |
| 70 | GUAGeI <sub>3</sub>  | -1.227358376 | 239.675425 | 1.8  | 5.6  | cubic |
| 71 | GUAGeBr <sub>3</sub> | -0.931641337 | 204.834552 | 2.7  | 3.8  | cubic |
| 72 | GUAGeCl <sub>3</sub> | -0.750871863 | 181.380137 | 3.35 | 4.4  | cubic |
| 73 | AZPbI <sub>3</sub>   | -1.004791141 | 260.106806 | 1.33 | 7.21 | cubic |
| 74 | AZPbBr <sub>3</sub>  | -0.930968134 | 222.864406 | 2.68 | 4.5  | cubic |
| 75 | AZPbCl <sub>3</sub>  | -0.708045595 | 201.246225 | 3.16 | 3.94 | cubic |
| 76 | AZSnI <sub>3</sub>   | -1.175418284 | 251.354111 | 1.35 | 5.9  | cubic |
| 77 | AZSnBr <sub>3</sub>  | -1.003867267 | 221.544331 | 2.08 | 4.7  | cubic |
| 78 | AZSnCl <sub>3</sub>  | -0.825861315 | 204.612222 | 2.7  | 3.9  | cubic |
| 79 | AZGeI <sub>3</sub>   | -1.170090061 | 248.33598  | 1.85 | 5.4  | cubic |

|    |                     |              |           |      |      |       |
|----|---------------------|--------------|-----------|------|------|-------|
| 80 | AZGeBr <sub>3</sub> | -1.078569334 | 215.12522 | 2.56 | 4.43 | cubic |
| 81 | AZGeCl <sub>3</sub> | -1.00483127  | 195.32461 | 3.24 | 3.7  | cubic |

## S2. Clustering results of formation data from WEKA

See Run information in the file : Clusteringresultsofformationdata.txt

## S3. The classification results of the (trees.REPTree) classifier in Weka.

See Run information in the file : trees.REPTreeclassifierinWeka.txt

## S4. Classification Learner App (Matlab)

### The formation data splitting model

---

Open data from file

```
cd 'C:\Data'
```

TODO: Split the data into training and test sets

```
tbl = readtable('Formation energy_Band gap_Volume_constant dielectric.csv');
% Create the cvpartition variable (Reserve 20% of data for testing)
pt = cvpartition(tbl.structure,'HoldOut',0.2);
%Store training and test data with a new variable
idxTrain = training(pt);
idxTest = test(pt);
% Create the training and test tables
dataTrain = tbl(training(pt),:);
dataTest = tbl(test(pt),:);
% open The Classification Learner App
classificationLearner
%To make predictions on a new table, T:
yfit = trainedModel.predictFcn(dataTest);
trainedModel.HowToPredict
%This script is to check the accuracy of the imported models
predictions = char(trainedModel.predictFcn(dataTest));
PredictedDAta = trainedModel.predictFcn(dataTest);
cat = categorical(tbl.structure);
%%accuracy
isocorrect = predictions == cell2mat(string((cat.structure)));
isocorrect=isocorrect(:,2);
accuracy = sum(isocorrect)*100/20;
```

**S5. Table S2. Stability Data for 63 ABX<sub>3</sub> perovskites.**

|    | <i>Formula</i>       | <i>t (tolerance)</i> | <i>μ (octahedral)</i> |
|----|----------------------|----------------------|-----------------------|
| 1  | MAPbI <sub>3</sub>   | 0.834352             | 0.540909091           |
| 2  | MAPbBr <sub>3</sub>  | 0.844047             | 0.607142857           |
| 3  | MAPbCl <sub>3</sub>  | 0.850893             | 0.657458564           |
| 4  | MASnI <sub>3</sub>   | 0.857107             | 0.5                   |
| 5  | MASnBr <sub>3</sub>  | 0.868872             | 0.56122449            |
| 6  | MASnCl <sub>3</sub>  | 0.87721              | 0.607734807           |
| 7  | MAGeI <sub>3</sub>   | 0.965343             | 0.331818182           |
| 8  | MAGeBr <sub>3</sub>  | 0.988382             | 0.37244898            |
| 9  | MAGeCl <sub>3</sub>  | 1.004992             | 0.403314917           |
| 10 | DMAPbI <sub>3</sub>  | 1.026253             | 0.540909091           |
| 11 | DMAPbBr <sub>3</sub> | 1.050569             | 0.607142857           |
| 12 | DMAPbCl <sub>3</sub> | 1.067741             | 0.657458564           |
| 13 | DMASnI <sub>3</sub>  | 1.054242             | 0.5                   |
| 14 | DMASnBr <sub>3</sub> | 1.081468             | 0.56122449            |
| 15 | DMASnCl <sub>3</sub> | 1.100764             | 0.607734807           |
| 16 | DMAGeI <sub>3</sub>  | 1.187372             | 0.331818182           |
| 17 | DMAGeBr <sub>3</sub> | 1.23022              | 0.37244898            |
| 18 | DMAGeCl <sub>3</sub> | 1.261112             | 0.403314917           |
| 19 | TMAPbI <sub>3</sub>  | 1.067971             | 0.540909091           |
| 20 | TMAPbBr <sub>3</sub> | 1.095465             | 0.607142857           |
| 21 | TMAPbCl <sub>3</sub> | 1.114882             | 0.657458564           |
| 22 | TMASnI <sub>3</sub>  | 1.097097             | 0.5                   |
| 23 | TMASnBr <sub>3</sub> | 1.127684             | 0.56122449            |
| 24 | TMASnCl <sub>3</sub> | 1.149363             | 0.607734807           |
| 25 | TMAGeI <sub>3</sub>  | 1.235639             | 0.331818182           |
| 26 | TMAGeBr <sub>3</sub> | 1.282793             | 0.37244898            |

|    |                      |          |             |
|----|----------------------|----------|-------------|
| 27 | TMAGeCl <sub>3</sub> | 1.31679  | 0.403314917 |
| 28 | EAPbI <sub>3</sub>   | 1.030425 | 0.540909091 |
| 29 | EAPbBr <sub>3</sub>  | 1.055058 | 0.607142857 |
| 30 | EAPbCl <sub>3</sub>  | 1.072456 | 0.657458564 |
| 31 | EASnI <sub>3</sub>   | 1.058528 | 0.5         |
| 32 | EASnBr <sub>3</sub>  | 1.086089 | 0.56122449  |
| 33 | EASnCl <sub>3</sub>  | 1.105624 | 0.607734807 |
| 34 | EAGeI <sub>3</sub>   | 1.192198 | 0.331818182 |
| 35 | EAGeBr <sub>3</sub>  | 1.235477 | 0.37244898  |
| 36 | EAGeCl <sub>3</sub>  | 1.26668  | 0.403314917 |
| 37 | FAPbI <sub>3</sub>   | 0.986622 | 0.540909091 |
| 38 | FAPbBr <sub>3</sub>  | 1.007917 | 0.607142857 |
| 39 | FAPbCl <sub>3</sub>  | 1.022958 | 0.657458564 |
| 40 | FASnI <sub>3</sub>   | 1.013529 | 0.5         |
| 41 | FASnBr <sub>3</sub>  | 1.037562 | 0.56122449  |
| 42 | FASnCl <sub>3</sub>  | 1.054595 | 0.607734807 |
| 43 | FAGeI <sub>3</sub>   | 1.141518 | 0.331818182 |
| 44 | FAGeBr <sub>3</sub>  | 1.180275 | 0.37244898  |
| 45 | FAGeCl <sub>3</sub>  | 1.208218 | 0.403314917 |
| 46 | GuaPbI <sub>3</sub>  | 1.038769 | 0.540909091 |
| 47 | GuaPbBr <sub>3</sub> | 1.064038 | 0.607142857 |
| 48 | GuaPbCl <sub>3</sub> | 1.081884 | 0.657458564 |
| 49 | GuaSnI <sub>3</sub>  | 1.067099 | 0.5         |
| 50 | GuaSnBr <sub>3</sub> | 1.095333 | 0.56122449  |
| 51 | GuaSnCl <sub>3</sub> | 1.115344 | 0.607734807 |
| 52 | GuaGeI <sub>3</sub>  | 1.201852 | 0.331818182 |
| 53 | GuaGeBr <sub>3</sub> | 1.245992 | 0.37244898  |
| 54 | GuaGeCl <sub>3</sub> | 1.277815 | 0.403314917 |
| 55 | AzPbI <sub>3</sub>   | 0.980364 | 0.540909091 |
| 56 | AzPbBr <sub>3</sub>  | 1.001183 | 0.607142857 |
| 57 | AzPbCl <sub>3</sub>  | 1.015886 | 0.657458564 |

|    |                     |          |             |
|----|---------------------|----------|-------------|
| 58 | AzSnI <sub>3</sub>  | 1.007101 | 0.5         |
| 59 | AzSnBr <sub>3</sub> | 1.03063  | 0.56122449  |
| 60 | AzSnCl <sub>3</sub> | 1.047306 | 0.607734807 |
| 61 | AzGeI <sub>3</sub>  | 1.134278 | 0.331818182 |
| 62 | AzGeBr <sub>3</sub> | 1.172389 | 0.37244898  |
| 63 | AzGeCl <sub>3</sub> | 1.199866 | 0.403314917 |

## S6. Cluster Data

Clustering results of stability data are in the file : Output\_Clusteringresultsofstabilitydata.txt

## S7. Table S3. The stability database with new attribute (cluster).

|    | Formula              | t (tolerance) | μ (octahedral) | Cluster  |
|----|----------------------|---------------|----------------|----------|
| 1  | MAPbI <sub>3</sub>   | 0.834352      | 0.540909       | cluster1 |
| 2  | MAPbBr <sub>3</sub>  | 0.844047      | 0.607143       | cluster1 |
| 3  | MAPbCl <sub>3</sub>  | 0.850893      | 0.657459       | cluster1 |
| 4  | MASnI <sub>3</sub>   | 0.857107      | 0.5            | cluster1 |
| 5  | MASnBr <sub>3</sub>  | 0.868872      | 0.561224       | cluster1 |
| 6  | MASnCl <sub>3</sub>  | 0.87721       | 0.607735       | cluster1 |
| 7  | MAGeI <sub>3</sub>   | 0.965343      | 0.331818       | cluster5 |
| 8  | MAGeBr <sub>3</sub>  | 0.988382      | 0.372449       | cluster5 |
| 9  | MAGeCl <sub>3</sub>  | 1.004992      | 0.403315       | cluster5 |
| 10 | DMAPbI <sub>3</sub>  | 1.026253      | 0.540909       | cluster5 |
| 11 | DMAPbBr <sub>3</sub> | 1.050569      | 0.607143       | cluster4 |
| 12 | DMAPbCl <sub>3</sub> | 1.067741      | 0.657459       | cluster4 |
| 13 | DMASnI <sub>3</sub>  | 1.054242      | 0.5            | cluster4 |
| 14 | DMASnBr <sub>3</sub> | 1.081468      | 0.561224       | cluster4 |
| 15 | DMASnCl <sub>3</sub> | 1.100764      | 0.607735       | cluster2 |
| 16 | DMAGeI <sub>3</sub>  | 1.187372      | 0.331818       | cluster3 |

|    |                      |          |          |          |
|----|----------------------|----------|----------|----------|
| 17 | DMAGeBr <sub>3</sub> | 1.23022  | 0.372449 | cluster3 |
| 18 | DMAGeCl <sub>3</sub> | 1.261112 | 0.403315 | cluster3 |
| 19 | TMAPbI <sub>3</sub>  | 1.067971 | 0.540909 | cluster4 |
| 20 | TMAPbBr <sub>3</sub> | 1.095465 | 0.607143 | cluster4 |
| 21 | TMAPbCl <sub>3</sub> | 1.114882 | 0.657459 | cluster2 |
| 22 | TMASnI <sub>3</sub>  | 1.097097 | 0.5      | cluster4 |
| 23 | TMASnBr <sub>3</sub> | 1.127684 | 0.561224 | cluster2 |
| 24 | TMASnCl <sub>3</sub> | 1.149363 | 0.607735 | cluster2 |
| 25 | TMAGeI <sub>3</sub>  | 1.235639 | 0.331818 | cluster3 |
| 26 | TMAGeBr <sub>3</sub> | 1.282793 | 0.372449 | cluster3 |
| 27 | TMAGeCl <sub>3</sub> | 1.31679  | 0.403315 | cluster3 |
| 28 | EAPbI <sub>3</sub>   | 1.030425 | 0.540909 | cluster5 |
| 29 | EAPbBr <sub>3</sub>  | 1.055058 | 0.607143 | cluster4 |
| 30 | EAPbCl <sub>3</sub>  | 1.072456 | 0.657459 | cluster4 |
| 31 | EASnI <sub>3</sub>   | 1.058528 | 0.5      | cluster4 |
| 32 | EASnBr <sub>3</sub>  | 1.086089 | 0.561224 | cluster4 |
| 33 | EASnCl <sub>3</sub>  | 1.105624 | 0.607735 | cluster2 |
| 34 | EAGeI <sub>3</sub>   | 1.192198 | 0.331818 | cluster3 |
| 35 | EAGeBr <sub>3</sub>  | 1.235477 | 0.372449 | cluster3 |
| 36 | EAGeCl <sub>3</sub>  | 1.26668  | 0.403315 | cluster3 |
| 37 | FAPbI <sub>3</sub>   | 0.986622 | 0.540909 | cluster5 |
| 38 | FAPbBr <sub>3</sub>  | 1.007917 | 0.607143 | cluster5 |
| 39 | FAPbCl <sub>3</sub>  | 1.022958 | 0.657459 | cluster5 |
| 40 | FASnI <sub>3</sub>   | 1.013529 | 0.5      | cluster5 |
| 41 | FASnBr <sub>3</sub>  | 1.037562 | 0.561224 | cluster5 |
| 42 | FASnCl <sub>3</sub>  | 1.054595 | 0.607735 | cluster4 |
| 43 | FAGeI <sub>3</sub>   | 1.141518 | 0.331818 | cluster2 |
| 44 | FAGeBr <sub>3</sub>  | 1.180275 | 0.372449 | cluster2 |
| 45 | FAGeCl <sub>3</sub>  | 1.208218 | 0.403315 | cluster3 |
| 46 | GuaPbI <sub>3</sub>  | 1.038769 | 0.540909 | cluster5 |
| 47 | GuaPbBr <sub>3</sub> | 1.064038 | 0.607143 | cluster4 |



|    |                      |          |          |          |
|----|----------------------|----------|----------|----------|
| 48 | GuaPbCl <sub>3</sub> | 1.081884 | 0.657459 | cluster4 |
| 49 | GuaSnI <sub>3</sub>  | 1.067099 | 0.5      | cluster4 |
| 50 | GuaSnBr <sub>3</sub> | 1.095333 | 0.561224 | cluster4 |
| 51 | GuaSnCl <sub>3</sub> | 1.115344 | 0.607735 | cluster2 |
| 52 | GuaGeI <sub>3</sub>  | 1.201852 | 0.331818 | cluster3 |
| 53 | GuaGeBr <sub>3</sub> | 1.245992 | 0.372449 | cluster3 |
| 54 | GuaGeCl <sub>3</sub> | 1.277815 | 0.403315 | cluster3 |
| 55 | AzPbI <sub>3</sub>   | 0.980364 | 0.540909 | cluster5 |
| 56 | AzPbBr <sub>3</sub>  | 1.001183 | 0.607143 | cluster5 |
| 57 | AzPbCl <sub>3</sub>  | 1.015886 | 0.657459 | cluster5 |
| 58 | AzSnI <sub>3</sub>   | 1.007101 | 0.5      | cluster5 |
| 59 | AzSnBr <sub>3</sub>  | 1.03063  | 0.561224 | cluster5 |
| 60 | AzSnCl <sub>3</sub>  | 1.047306 | 0.607735 | cluster4 |
| 61 | AzGeI <sub>3</sub>   | 1.134278 | 0.331818 | cluster2 |
| 62 | AzGeBr <sub>3</sub>  | 1.172389 | 0.372449 | cluster2 |
| 63 | AzGeCl <sub>3</sub>  | 1.199866 | 0.403315 | cluster3 |

## S8. The trees.j48 classifier information

The run information is in the treesj48classifier information.txt

S9. Output of the functions.Logistic classifier information

The output is in the Outputofthefunctions.Logisticclassifierinformation.txt

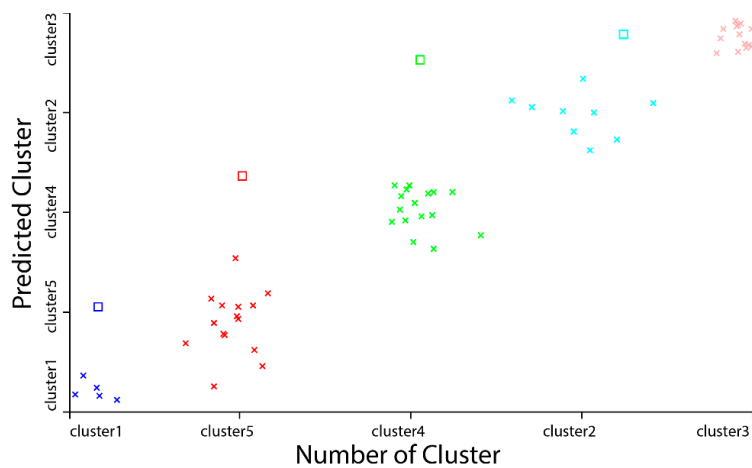

**Figure S1.** Visualize the trees.j48 classifier error, where the cubic points are the error classified cluster.

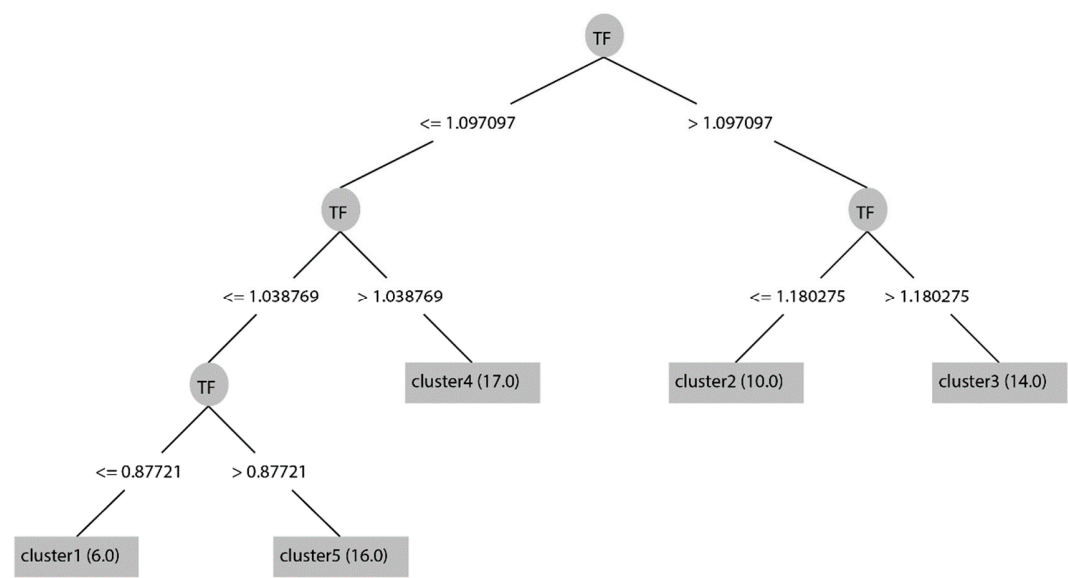

**Figure S2.** The tree for trees.j48 classifier.

## S10. MATLAB code for using the conditions of the stability limits to identify the stable compounds

Open file

```
cd 'C:\Users\Stability Data'
StabilitydataCluster = readtable('Stability data with cluster attributes');
```

### 1. Change the name of attributes

```
StabilitydataCluster.Properties.VariableNames{2} = 'ToleranceFactor , t';
StabilitydataCluster.Properties.VariableNames{3} = 'OctahedralFactor ,  $\mu$ ';
```

### 2. Adding a new variable that includes stability conditions

```
% if stabilityTF=0 or stabilityOcta=0 that mean it is in the unstable limits,
% If they =1 that mesn it is in the stable limit.
StabilityTF = StabilitydataCluster("ToleranceFactor , t") > 0.81;
StabilityTF = StabilitydataCluster("ToleranceFactor , t") < 1.11;
StabilityOcta = StabilitydataCluster("OctahedralFactor ,  $\mu$ ") > 0.89;
StabilityOcta = StabilitydataCluster("OctahedralFactor ,  $\mu$ ") > 0.44;

% If tolerance and octahedral factors in the stability limits, then stability=2
% If one of them in the stable but another one is in the instable, then stability=1
% If tolerance and octahedral factors in the instability limits, then stability=0

Stability= StabilityTF+StabilityOcta;

% converting from numric to nomenal
StabilityTF = nominal(StabilityTF);
StabilityOcta = nominal(StabilityOcta);
Stability = nominal(Stability);

% change name of value, If stabilityTF=true then it will be stableTF, if stabilityTF=false then 0
StabilityTF(StabilityTF=="true") = 't stable';
StabilityTF(StabilityTF=="false") = '0';

% change name of value, If stabilityTF=true then it will be stableTF, if stabilityTF=false then instableTF
StabilityOcta(StabilityOcta=="true") = ' $\mu$  stable';
StabilityOcta(StabilityOcta=="false") = '0';
```

```

nomStability = nominal(Stability);

Stability(Stability=="2") = 'stable';
Stability(Stability=="0") = 'non';
Stability(Stability=="1") = 'one Stable';

Stable = table(StabilityTF,StabilityOcta,Stability);

StabilityData = [StabilitydataCluster Stable];

```

### 3. Add stability compounds in new table

```

StabilityFormula = StabilityData.Formula(StabilityData.Stability=='stable');
TFCompound = StabilityData.("ToleranceFactor , t")(StabilityData.Stability=='stable');
OctaCompounds = StabilityData.("OctahedralFactor , μ")(StabilityData.Stability=='stable');
CCluster = StabilityData.('cluster')(StabilityData.Stability=='stable');

StabilityCompounds = table(StabilityFormula,TFCompound,OctaCompounds,CCluster);

```

### 4. Save final data as csv file

```

writetable(StabilityCompounds,'FinalStabilityValues.csv');

```

**S11. Table S4. Final 38 compounds that achieved the stability conditions for the tolerance and octahedral factor ( $0.81 < t < 1.11$ ,  $0.44 < \mu < 0.89$ ) extracted from the main dataset.**

|   | <i>Formula</i>          | <i>t</i> | <i>μ</i> | <i>Cluster</i> |
|---|-------------------------|----------|----------|----------------|
| 1 | 'MAPbI <sub>3</sub> '   | 0.834352 | 0.540909 | 'cluster1'     |
| 2 | 'MAPbBr <sub>3</sub> '  | 0.844047 | 0.607143 | 'cluster1'     |
| 3 | 'MAPbCl <sub>3</sub> '  | 0.850893 | 0.657459 | 'cluster1'     |
| 4 | 'MASnI <sub>3</sub> '   | 0.857107 | 0.5      | 'cluster1'     |
| 5 | 'MASnBr <sub>3</sub> '  | 0.868872 | 0.561224 | 'cluster1'     |
| 6 | 'MASnCl <sub>3</sub> '  | 0.87721  | 0.607735 | 'cluster1'     |
| 7 | 'DMAPbI <sub>3</sub> '  | 1.026253 | 0.540909 | 'cluster5'     |
| 8 | 'DMAPbBr <sub>3</sub> ' | 1.050569 | 0.607143 | 'cluster4'     |

|    |                                       |          |          |            |
|----|---------------------------------------|----------|----------|------------|
| 9  | 'DMAPbCl <sub>3</sub> '               | 1.067741 | 0.657459 | 'cluster4' |
| 10 | 'DMA <sub>3</sub> SnI <sub>3</sub> '  | 1.054242 | 0.5      | 'cluster4' |
| 11 | 'DMA <sub>3</sub> SnBr <sub>3</sub> ' | 1.081468 | 0.561224 | 'cluster4' |
| 12 | 'DMA <sub>3</sub> SnCl <sub>3</sub> ' | 1.100764 | 0.607735 | 'cluster2' |
| 13 | 'TMAPbI <sub>3</sub> '                | 1.067971 | 0.540909 | 'cluster4' |
| 14 | 'TMAPbBr <sub>3</sub> '               | 1.095465 | 0.607143 | 'cluster4' |
| 15 | 'TMA <sub>3</sub> SnI <sub>3</sub> '  | 1.097097 | 0.5      | 'cluster4' |
| 16 | 'EAPbI <sub>3</sub> '                 | 1.030425 | 0.540909 | 'cluster5' |
| 17 | 'EAPbBr <sub>3</sub> '                | 1.055058 | 0.607143 | 'cluster4' |
| 18 | 'EAPbCl <sub>3</sub> '                | 1.072456 | 0.657459 | 'cluster4' |
| 19 | 'EASnI <sub>3</sub> '                 | 1.058528 | 0.5      | 'cluster4' |
| 20 | 'EASnBr <sub>3</sub> '                | 1.086089 | 0.561224 | 'cluster4' |
| 21 | 'EASnCl <sub>3</sub> '                | 1.105624 | 0.607735 | 'cluster2' |
| 22 | 'FAPbI <sub>3</sub> '                 | 0.986622 | 0.540909 | 'cluster5' |
| 23 | 'FAPbBr <sub>3</sub> '                | 1.007917 | 0.607143 | 'cluster5' |
| 24 | 'FAPbCl <sub>3</sub> '                | 1.022958 | 0.657459 | 'cluster5' |
| 25 | 'FASnI <sub>3</sub> '                 | 1.013529 | 0.5      | 'cluster5' |
| 26 | 'FASnBr <sub>3</sub> '                | 1.037562 | 0.561224 | 'cluster5' |
| 27 | 'FASnCl <sub>3</sub> '                | 1.054595 | 0.607735 | 'cluster4' |
| 28 | 'GuaPbI <sub>3</sub> '                | 1.038769 | 0.540909 | 'cluster5' |
| 29 | 'GuaPbBr <sub>3</sub> '               | 1.064038 | 0.607143 | 'cluster4' |
| 30 | 'GuaPbCl <sub>3</sub> '               | 1.081884 | 0.657459 | 'cluster4' |
| 31 | 'GuaSnI <sub>3</sub> '                | 1.067099 | 0.5      | 'cluster4' |
| 32 | 'GuaSnBr <sub>3</sub> '               | 1.095333 | 0.561224 | 'cluster4' |
| 33 | 'AzPbI <sub>3</sub> '                 | 0.980364 | 0.540909 | 'cluster5' |
| 34 | 'AzPbBr <sub>3</sub> '                | 1.001183 | 0.607143 | 'cluster5' |
| 35 | 'AzPbCl <sub>3</sub> '                | 1.015886 | 0.657459 | 'cluster5' |
| 36 | 'AzSnI <sub>3</sub> '                 | 1.007101 | 0.5      | 'cluster5' |
| 37 | 'AzSnBr <sub>3</sub> '                | 1.03063  | 0.561224 | 'cluster5' |
| 38 | 'AzSnCl <sub>3</sub> '                | 1.047306 | 0.607735 | 'cluster4' |

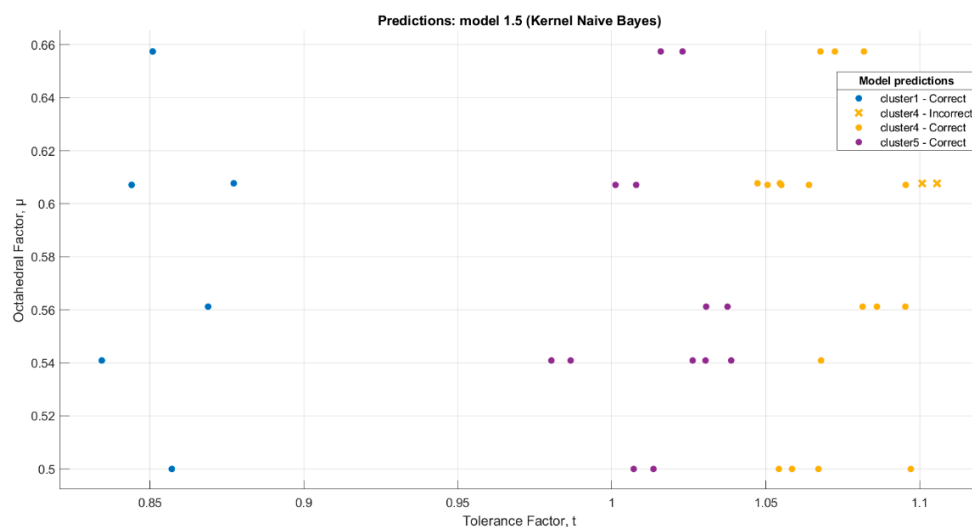

**Figure S3.** The Kernel Naive Bayes classifier prediction model for the 38 stable datasets.

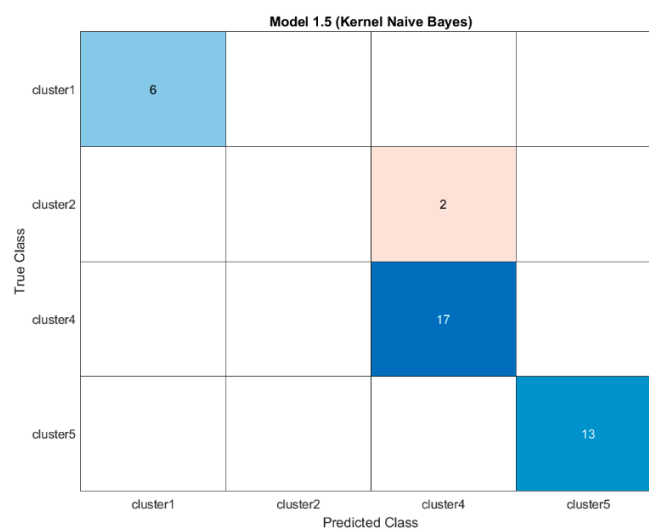

**Figure S4.** The confusion matrix of the Kernel Naive Bayes classifier for the 38 stable datasets.
